# Supplementary material
Source: PubMed Central journal article supplement (PMC5734162)
Supplement: Supp_Fig1.pdf [file Supp_Fig1.pdf]

## Supplementary Data

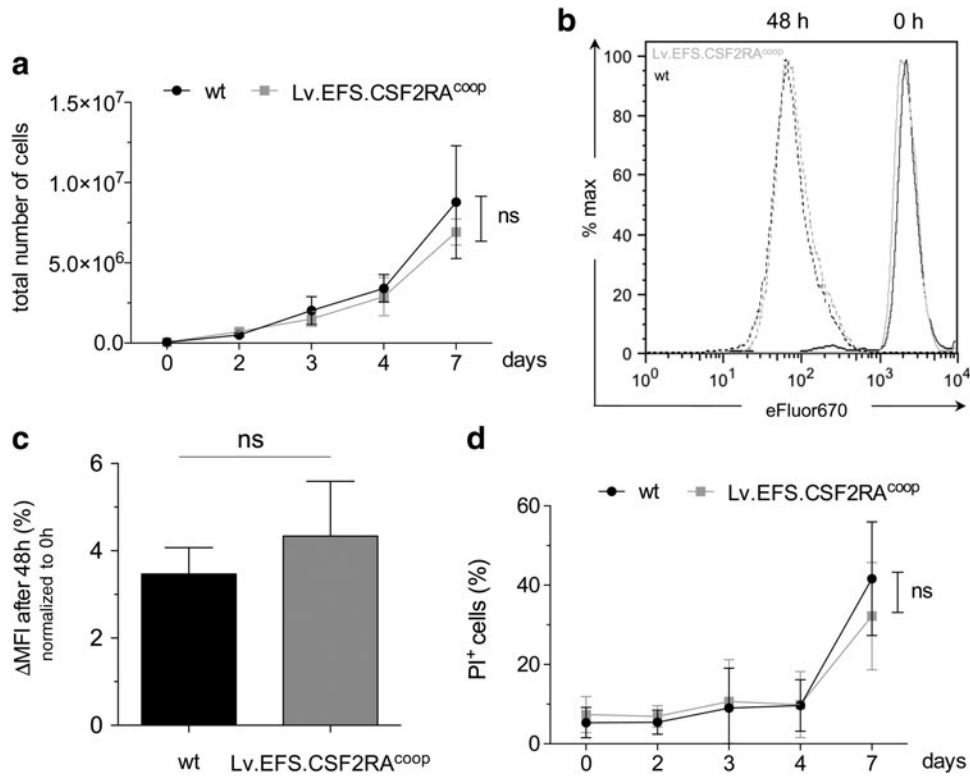

**Supplementary Figure S1.** Safety analysis of *CSF2RA* overexpression in Ba/F3 cells. **(a)** Expansion of non-transduced Ba/F3 cells (wt) and Lv.EFS.CSF2RA<sup>coop</sup> transduced Ba/F3 cells evaluated by total number of cells over time ( $n=3$ ; two-way ANOVA using Sidak's *post hoc* testing). **(b)** Representative histogram depicting proliferation of non-transduced Ba/F3 cells (wt) and Lv.EFS.CSF2RA<sup>coop</sup> transduced Ba/F3 cells by dilution of eFluor670 dye between 0 h (time of labeling) and 48 h in culture. **(c)** eFluor670 mean fluorescence intensity (MFI) values of wt and Lv.EFS.CSF2RA<sup>coop</sup> transduced Ba/F3 cells 48 h after labeling normalized to 0 h as 100% ( $n=3$ ; Student's *t*-test). **(d)** Cell death over 7 days at standard culture conditions analyzed by percentage of PI<sup>+</sup> cells ( $n=3$ ; two-way ANOVA using Sidak's *post hoc* testing).
