# Supplementary material
Source: PubMed Central journal article supplement (PMC5734162)
Supplement: Supp_Fig2.pdf [file Supp_Fig2.pdf]

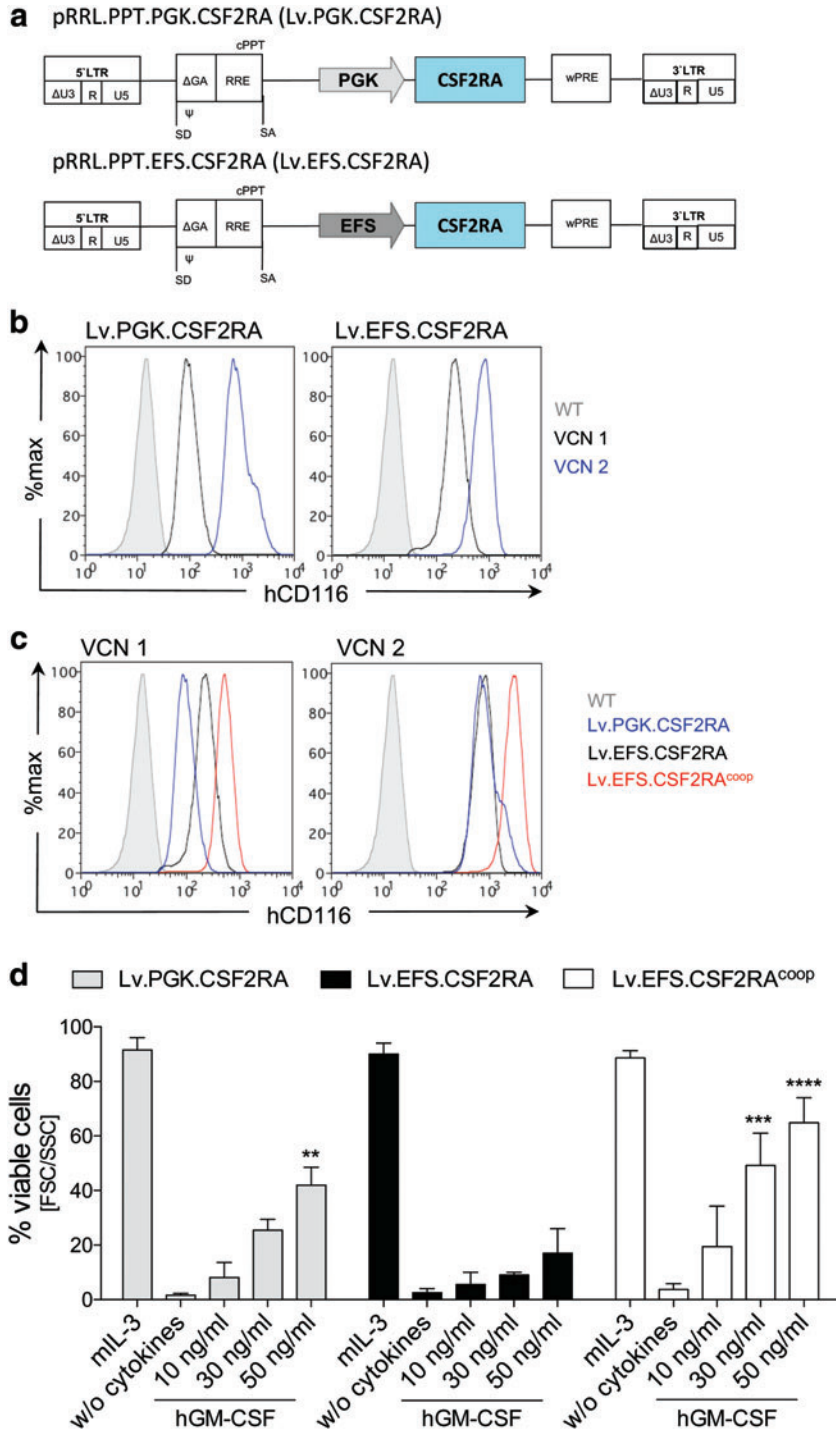

**Supplementary Figure S2.** Analysis of different *CSF2RA*-expressing lentiviral constructs in Ba/F3 cells. **(a)** Schematic presentation of third-generation self-inactivating (SIN) lentiviral constructs expressing the wt or codon-optimized (coop) *CSF2RA* cDNA by the phosphoglycerate kinase promoter (PGK) or the elongation factor 1  $\alpha$  short promoter (EFS), respectively. **(b)** and **(c)** Representative histograms depicting human CD116 expression of non-transduced Ba/F3 cells (wt), Lv.PGK.CSF2RA<sup>-</sup>, Lv.EFS.CSF2RA<sup>-</sup>, and Lv.EFS.CSF2RA<sup>coop</sup>-transduced Ba/F3 cells harboring defined numbers of one or two vector copies. **(d)** hGM-CSF-dependent survival of Lv.PGK.CSF2RA<sup>-</sup>, Lv.EFS.CSF2RA<sup>-</sup>, and Lv.EFS.CSF2RA<sup>coop</sup>-transduced Ba/F3 cells with a defined VCN of 1 ( $n=3$ ; one-way ANOVA using Dunnett's *post hoc* testing). \*\* $p < 0.01$ ; \*\*\* $p < 0.001$ ; \*\*\*\* $p < 0.0001$ .
