# Supplementary material
Source: PubMed Central journal article supplement (PMC5734162)
Supplement: Supp_Fig3.pdf [file Supp_Fig3.pdf]

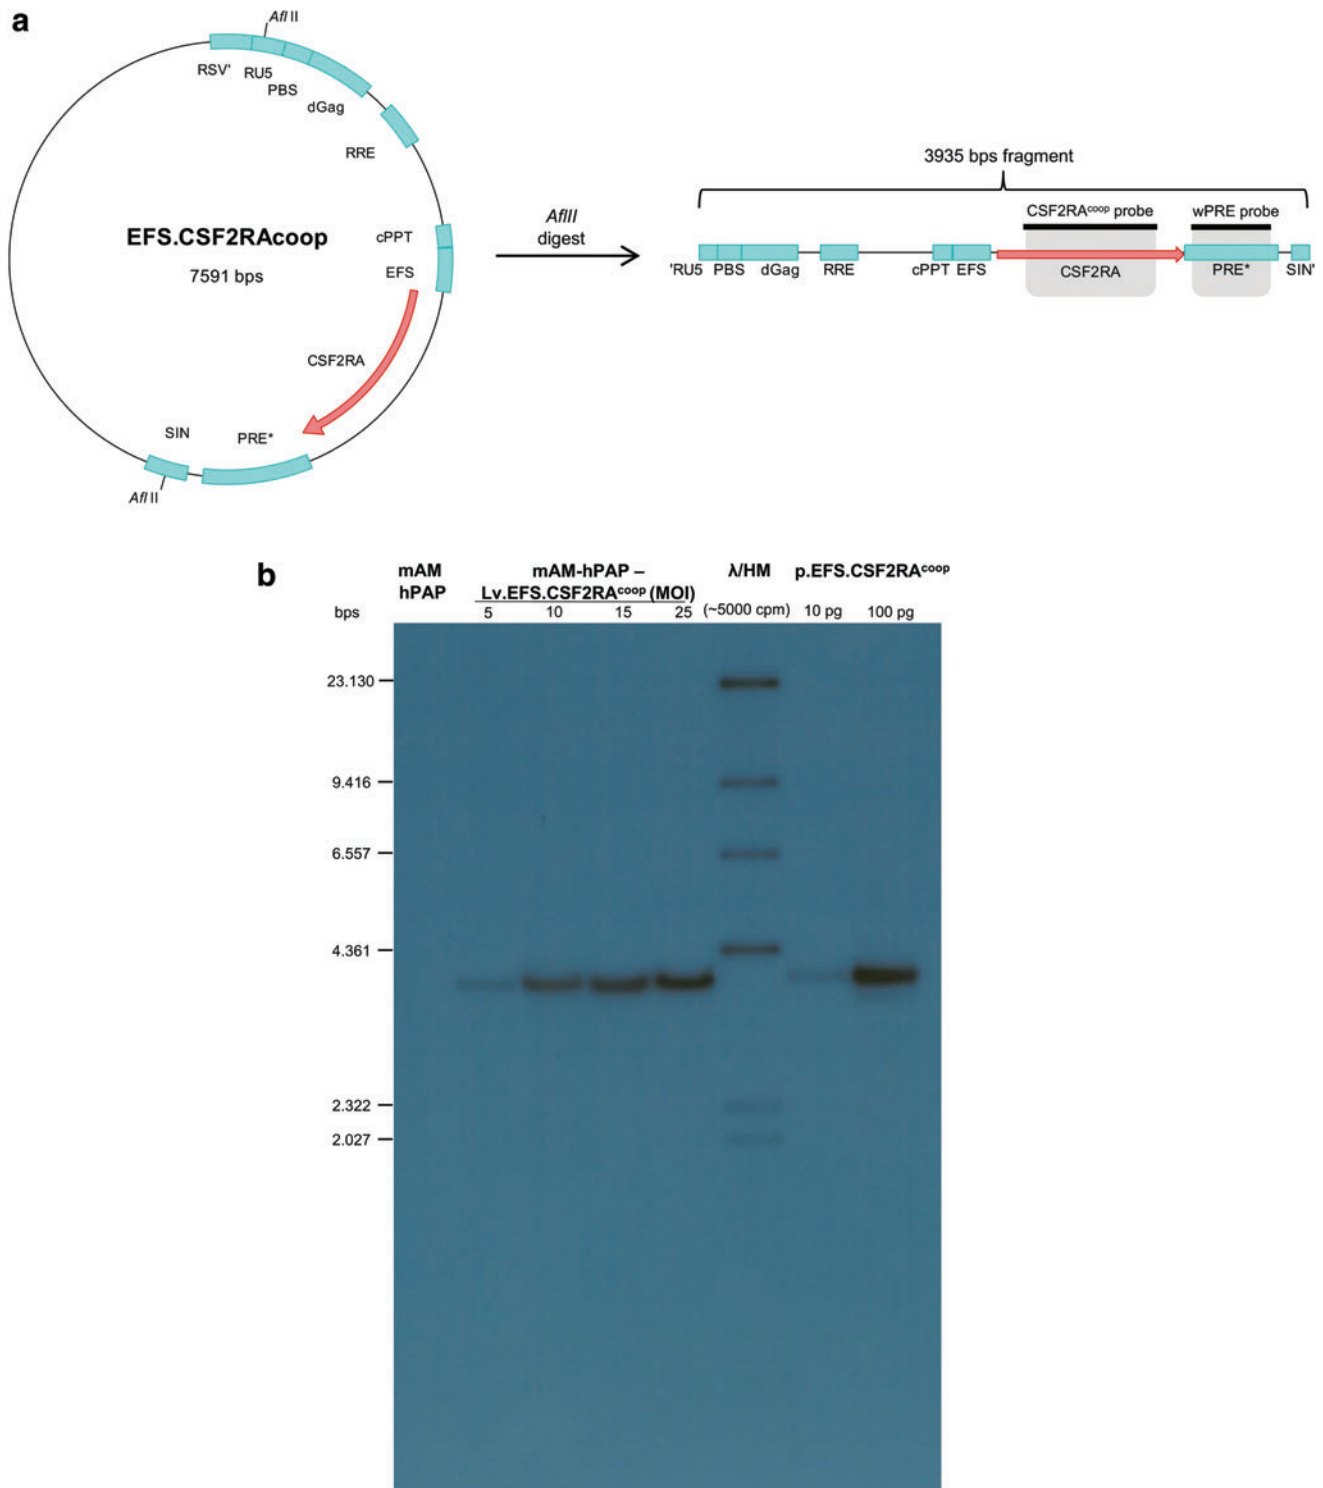

**Supplementary Figure S3.** Southern blot analysis of vector integration. **(a)** Schematic illustration of sample preparation for Southern blot analysis. Lv.EFS.CSF2RA<sup>coop</sup> plasmid DNA or genomic DNA of transduced cells was digested using AflIII to obtain a 3,935 bp fragment in case of vector integration. Labeled probes were detecting either the CSF2RA<sup>coop</sup> sequence or the wPRE sequence. **(b)** Southern Blot analysis using a wPRE probe to trace the transgene integrated to the genome of mAM-hPAP cells transduced with Lv.EFS.CSF2RA<sup>coop</sup>. No transgene expression is detectable in mAM-hPAP cells, whereas the signal is increasing with higher MOIs used to transduce the cells. Lentiviral transfer plasmid in different concentrations was used as a positive control.
